# Supplementary material for: Transcription start site scanning requires the fungi-specific hydrophobic loop of Tfb3
Source: PubMed Central journal article supplement (PMC11514446; doi:10.1093/nar/gkae805), 2024-09-17
Supplement: gkae805_supplemental_file.pdf [file gkae805_supplemental_file.pdf]

# **Transcription start site scanning requires the fungi-specific hydrophobic loop of Tfb3**

Chun Yang<sup>1</sup>, Pratik Basnet<sup>2</sup>, Samah Sharmin<sup>1</sup>, Hui Shen<sup>3</sup>, Craig D. Kaplan<sup>2</sup>, and Kenji Murakami<sup>1\*</sup>

<sup>1</sup> Department of Biochemistry and Biophysics, Perelman School of Medicine, University of Pennsylvania, Philadelphia, Pennsylvania, 19104, U.S.A.

<sup>2</sup> Department of Biological Sciences, University of Pittsburgh, Pittsburgh, Pennsylvania, 15260, U.S.A.

<sup>3</sup> School of Life Science and Technology, China Pharmaceutical University, Nanjing, 210009, China.

Corresponding author: Kenji Murakami  
Email: [kenjim@pennmedicine.upenn.edu](mailto:kenjim@pennmedicine.upenn.edu)

## **SUPPLEMENTARY DATA**

Supplementary Table S1

Supplementary Figures S1-S6

**Supplementary Table S1. Cryo-EM data collection and refinement statistics**

|                                                     | PIC- $\Delta$ TFIIK form 1                                             | PIC- $\Delta$ TFIIK form 2                                              |
|-----------------------------------------------------|------------------------------------------------------------------------|-------------------------------------------------------------------------|
| <b>Data collection and processing</b>               |                                                                        |                                                                         |
| Magnification                                       | 81,000                                                                 | 81,000                                                                  |
| Voltage (kV)                                        | 300                                                                    | 300                                                                     |
| Electron exposure (e <sup>-</sup> /Å <sup>2</sup> ) | 50                                                                     | 50                                                                      |
| Defocus range (μm)                                  | -1.0 to -2.5                                                           | -1.0 to -2.5                                                            |
| Pixel size (Å)                                      | 0.54                                                                   | 0.54                                                                    |
| Map resolution (Å)(FSC 0.143)                       | 3.0 <sup>a</sup> /6.1 <sup>b</sup> /3.9 <sup>c</sup> /7.4 <sup>d</sup> | 3.5 <sup>a</sup> /4.7 <sup>b</sup> /4.6 <sup>c</sup> /7.44 <sup>d</sup> |
| EMDB entry                                          | EMD-42438                                                              | EMD-42437                                                               |
| Final particle                                      | 138,691                                                                | 90,136                                                                  |
| <b>Model Refinement</b>                             |                                                                        |                                                                         |
| Model resolution (Å) (FSC 0.5)                      | 3.7                                                                    | 4.9                                                                     |
| PDB entry                                           | 8UOT                                                                   | 8UOQ                                                                    |
| <b>Model composition</b>                            |                                                                        |                                                                         |
| Non-hydrogen atoms                                  | 70,523                                                                 | 70,481                                                                  |
| Protein residues                                    | 8,540                                                                  | 8,540                                                                   |
| Nucleotides                                         | 128                                                                    | 126                                                                     |
| Ligands                                             | 18                                                                     | 18                                                                      |
| <b>R.m.s deviations</b>                             |                                                                        |                                                                         |
| Bond lengths (Å)                                    | 0.01                                                                   | 0.006                                                                   |
| Bond angles (°)                                     | 1.091                                                                  | 1.036                                                                   |
| MolProbity score                                    | 2.11                                                                   | 2.10                                                                    |
| Clash score                                         | 12.00                                                                  | 11.65                                                                   |
| Poor rotamer (%)                                    | 0.03                                                                   | 0.03                                                                    |
| <b>Ramachandran plot</b>                            |                                                                        |                                                                         |
| Favored (%)                                         | 90.98                                                                  | 91.13                                                                   |
| Allowed (%)                                         | 8.95                                                                   | 8.83                                                                    |
| Disallowed (%)                                      | 0.07                                                                   | 0.04                                                                    |
| <b>Model vs. Data</b>                               |                                                                        |                                                                         |
| CC (mask)                                           | 0.69                                                                   | 0.69                                                                    |
| CC (box)                                            | 0.85                                                                   | 0.85                                                                    |
| CC (volume)                                         | 0.69                                                                   | 0.70                                                                    |
| CC (peaks)                                          | 0.64                                                                   | 0.62                                                                    |
| CC (main chain)                                     | 0.76                                                                   | 0.76                                                                    |
| CC (side chain)                                     | 0.77                                                                   | 0.77                                                                    |

<sup>a</sup>Pol II, TFIIF; <sup>b</sup>DNA, TBP, TFIIB, TFIIE; <sup>c</sup>TFIIH core; <sup>d</sup>Ssl2, Tfb5 and Tfb2;

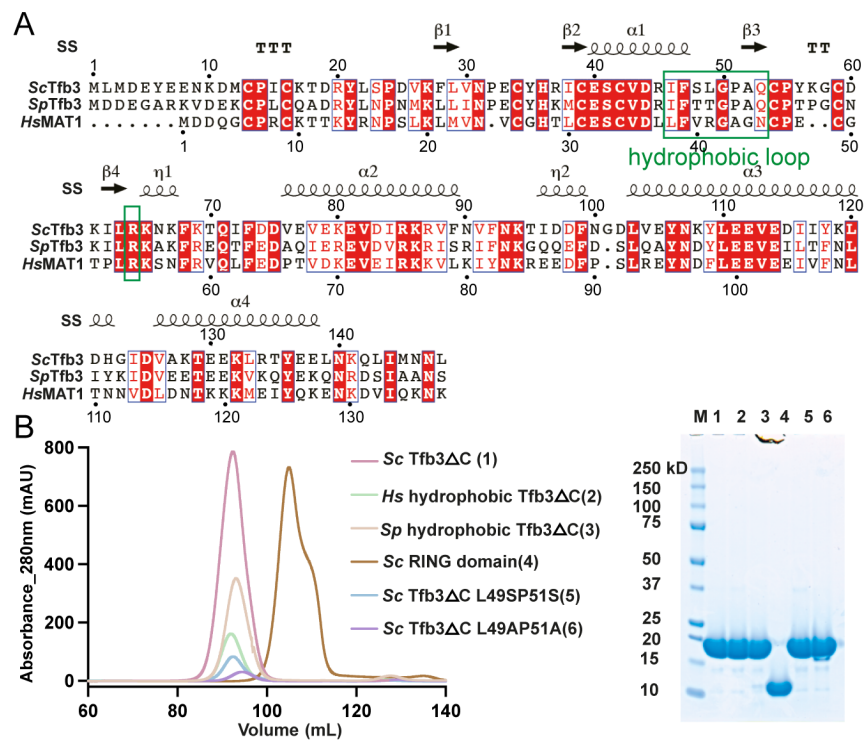

**Supplementary Figure S1. Sequence alignment of Tfb3/MAT1. (A)** Sequence alignment of Tfb3ΔC (residues 1-148) from *Saccharomyces cerevisiae* (Sc), *Schizosaccharomyces pombe* (Sp), and *Homo sapiens* (Hs) with secondary structure annotations from Sc PIC. The hydrophobic loop as well as Arg64 is indicated by green boxes. **(B)** Size exclusion chromatogram of purified Tfb3ΔC and HL mutants (left), and SDS-PAGE followed by Coomassie blue staining (right).

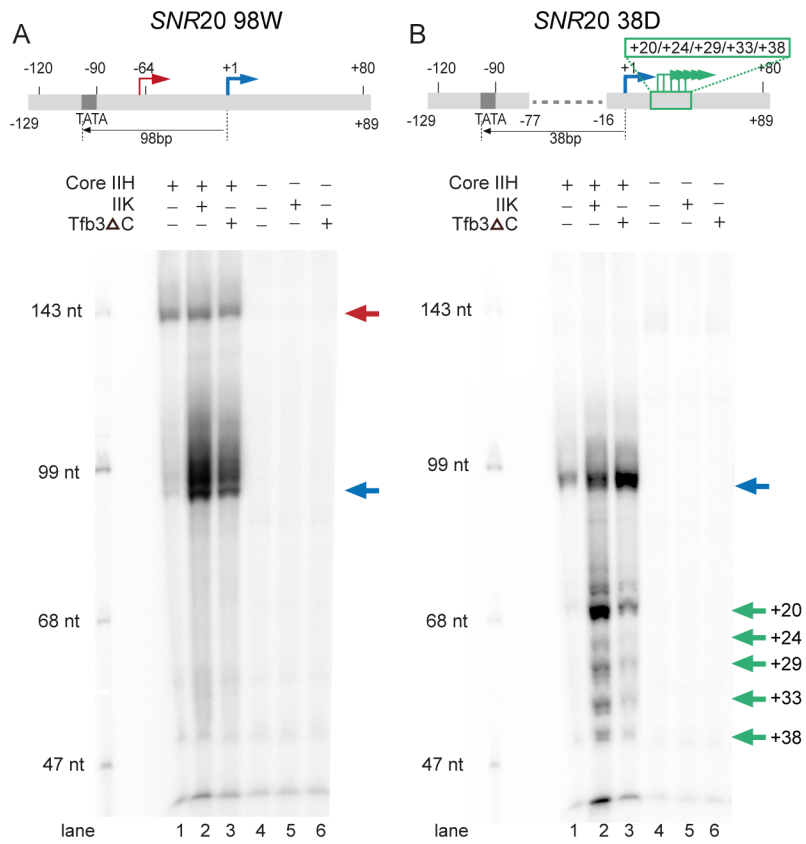

**Supplementary Figure S2. Run-off transcription *in vitro* with SNR20 98W or SNR20 38D.** The reactions of TFIIK-independent transcription involving 2 pmol of core TFIIH were performed with SNR20 98W (A) or SNR20 38D (B) as in Figure 2, with additional factors (8 pmol TFIIK, 8 pmol Tfb3ΔC) as indicated over the lanes.

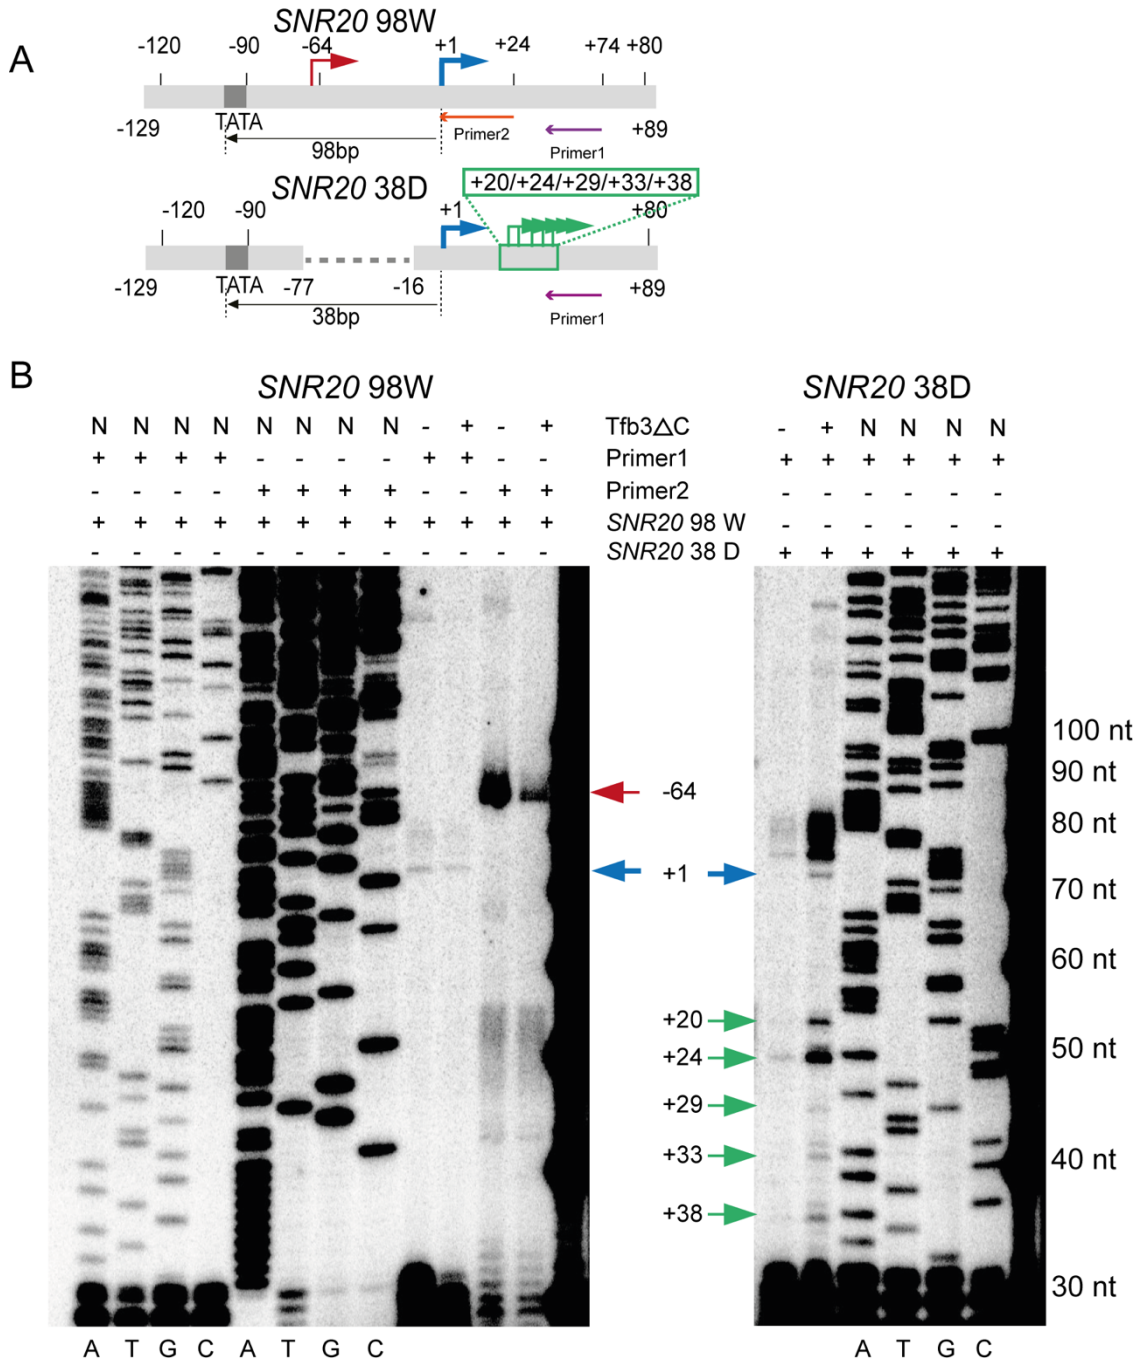

**Supplementary Figure S3. Primer extension analysis *in vitro* with SNR20 98W or SNR20 38D.** Reactions were performed as in Figure S2 with or without Tfb3ΔC as indicated over lanes, followed by primer extension analysis (see Methods).

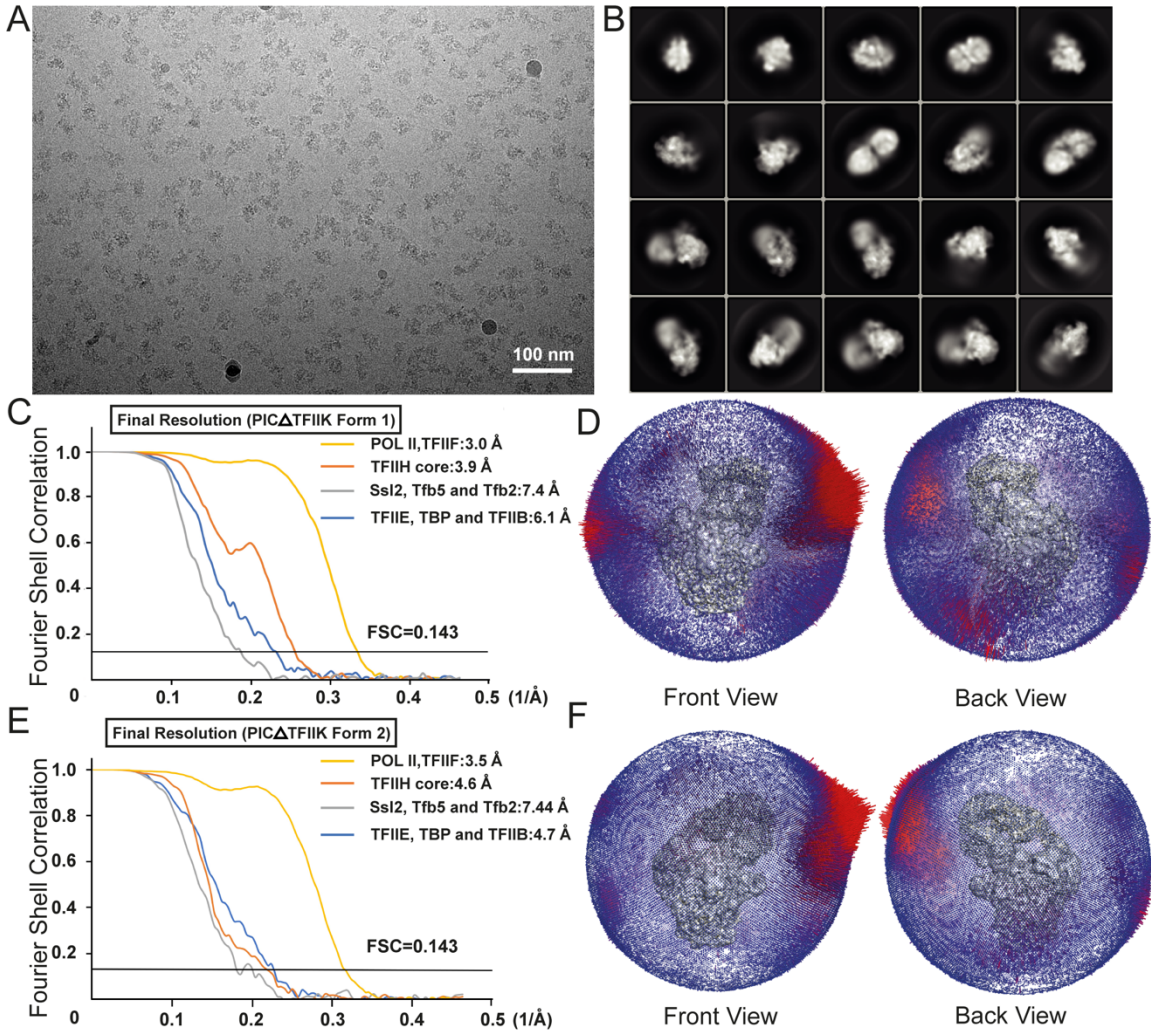

G

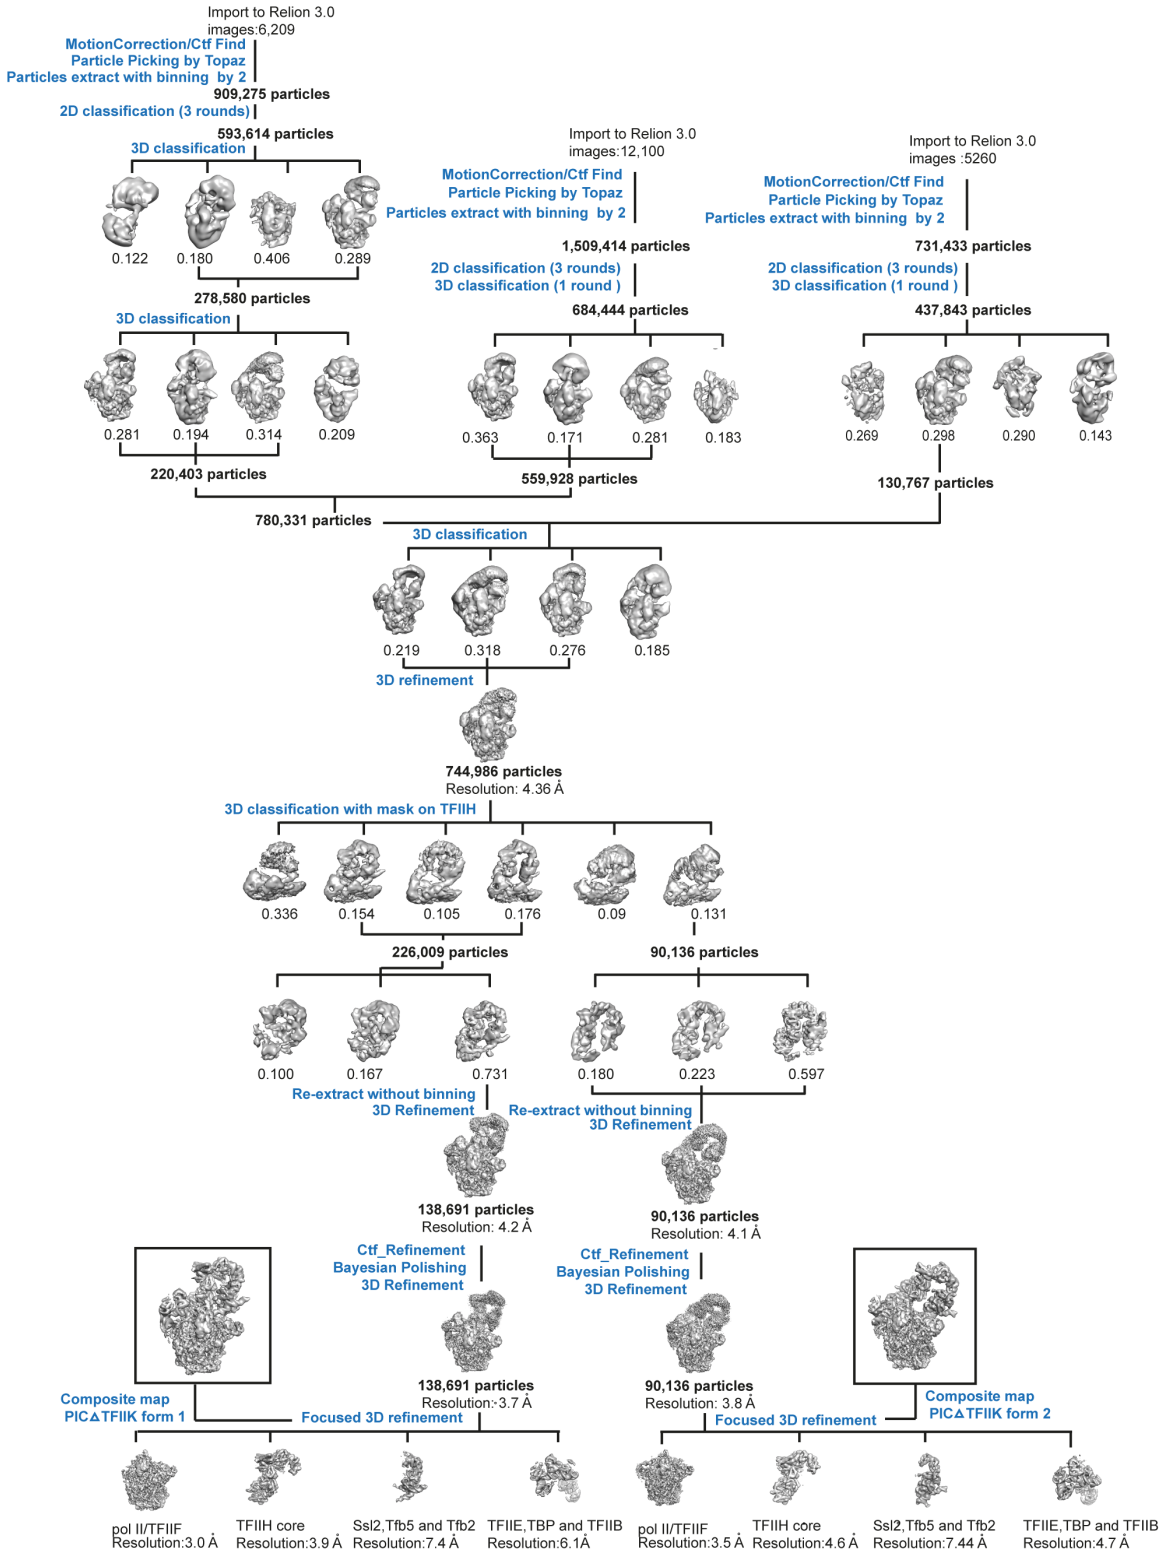



**Supplementary Figure S4. Cryo-EM data analysis of PIC- $\Delta$ TFIIK.** (A) A representative raw micrograph of PIC- $\Delta$ TFIIK. (B) Representative 2D class averages of PIC- $\Delta$ TFIIK. (C-D) FSC curves (C) and corresponding angular distribution (D) of particles of PIC $\Delta$ TFIIK form 1 from front view (left) and back view (right). (E-F) Same as (C-D) but for PIC- $\Delta$ TFIIK form 2. (G) Cryo-EM processing pipeline of PIC- $\Delta$ TFIIK.



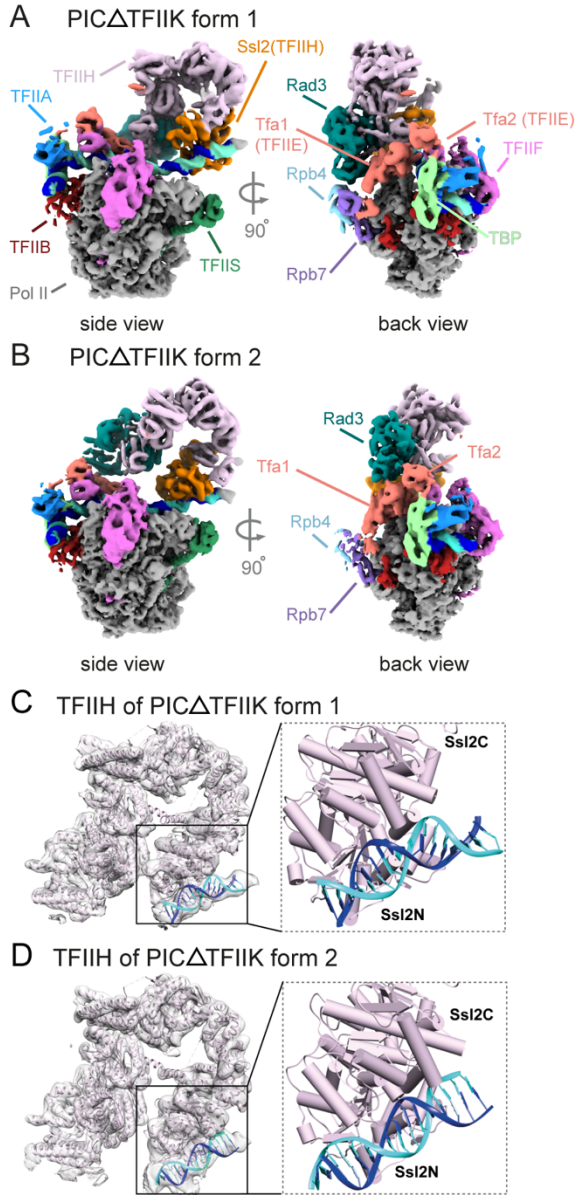

**Supplementary Figure S5. Cryo-EM maps of PIC- $\Delta$ TFIIK**

(A) Cryo-EM map of form 1 of PIC- $\Delta$ TFIIK in side (left) and back (right) views. The map corresponds to the model in Figure 4A. (B) Same as (A) but for form 2. (C-D) Composite density maps and models for TFIIF in the strong binding state, corresponding to maps in (A) and (B).

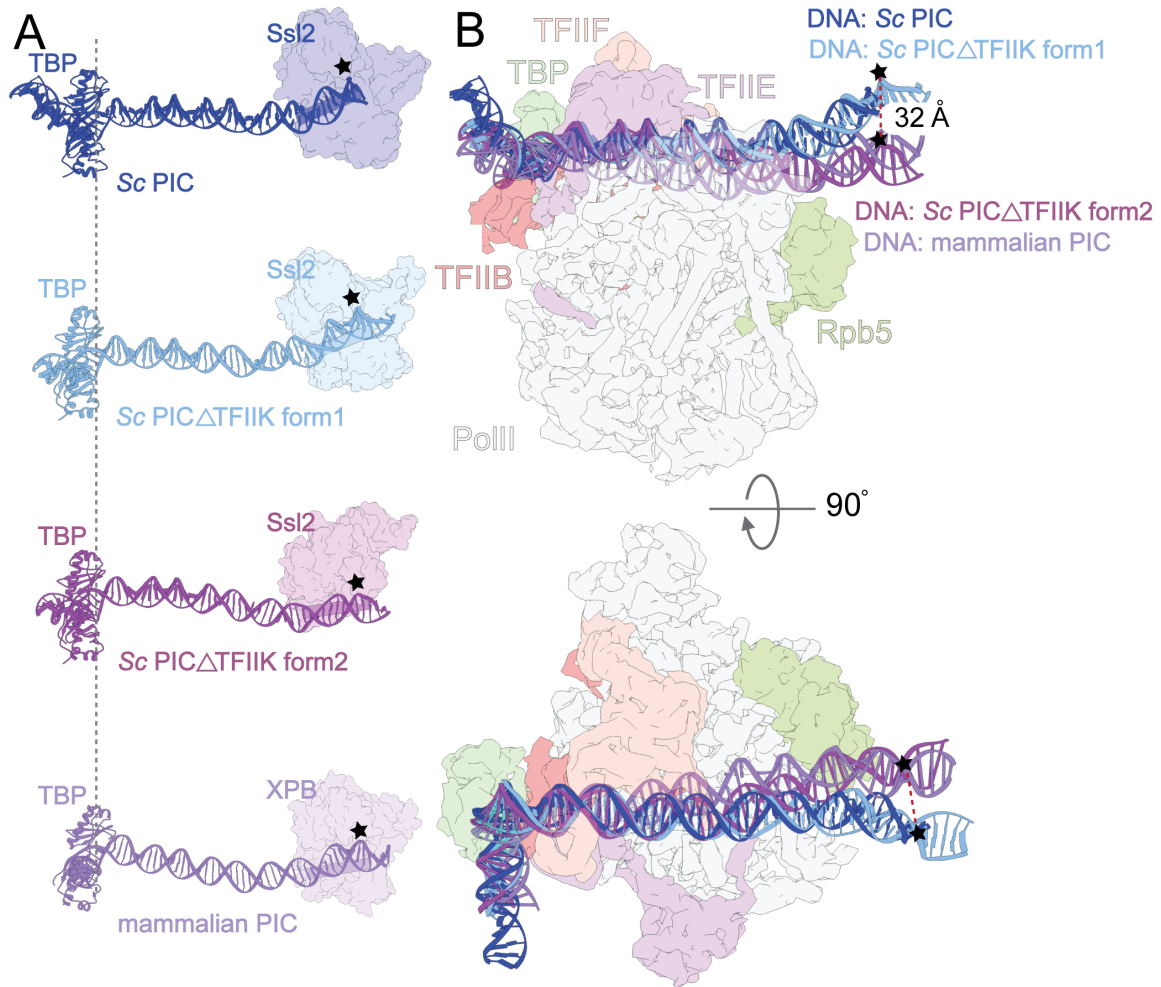

**Supplementary Figure S6. Comparison of paths of promoter DNA in Sc PIC, mammalian PIC and Sc PIC- $\Delta$ IIK (forms 1 and 2)**

(A) Relationship between promoter DNA, TBP, and Ssl2/XPB. Ssl2/XPB bind DNA 47 bp downstream of the TATA box (indicated by a star) in all forms. Structures are aligned at the first T of the TATA box (dashed line). (B) Superposition of Sc PIC (PDB ID: 7ML0), Sc PIC- $\Delta$ IIK form1, Sc PIC- $\Delta$ IIK form 2 and mammalian PIC (PDB ID: 7NVZ) from side view (top) and top view (bottom). TFIIF is omitted for clarity.
